not show signs of awakening during a period of at least four times that necessary for sham operated animals to recover. It is believed that tissues other than the liver are quantitatively unimportant in the rapid detoxification of thiopental in the dog.

## REFERENCES

1. Brodie, B. B., *et al.*: Fate of Thiopental in Man and Method for its Estimation in Biological Material, *J. Pharmacol. & Exper. Therap.* **88**: 85-96 (Jan.) 1950.
2. Shideman, F. E.; Kelly, A. R., and Adams, B. J.: Role of Liver in Detoxication of Thiopental (Pentothal) and 2 Other Thiobarbiturates, *J. Pharmacol. & Exper. Therap.* **81**: 331-339 (Dec.) 1947.
3. Kelly, A. R., and Shideman, F. E.: Liver as Major Organ Involved in Detoxication of Thiopental by Dog, *Fed. Proc.* **8**: 306 (March) 1949.
4. Scheffley, C. H., and Higgins, G. M.: Effect of Partial Hepatectomy on Action of Certain Barbiturates and a Phenylurea Derivative, *Am. J. M. Sci.* **200**: 264-268 (Aug.) 1940.
5. Richards, R. K., and Appel, M.: Barbiturates and Liver, *Anesth. & Analg.* **20**: 64-77 (March-April) 1941.
6. Masson, G. M. C., and Beland, E.: Influence of Liver and Kidney on Duration of Anesthesia Produced by Barbiturates, *Anesthesiology* **6**: 483-491 (Sept.) 1945.
7. Markowitz, J.: *Experimental Surgery*, ed. 2, Baltimore, Williams and Wilkins, 1949.
8. Gould, T. C., and Shideman, F. E.: *In vitro* Metabolism of Thiopental by Fortified, Cell-free Tissue Preparation of Rat, *J. Pharmacol. & Exper. Therap.* **104**: 427-439 (April) 1952.

---

## INTERNATIONAL CONGRESS ON GYNECOLOGY AND OBSTETRICS

The International Congress of Gynecology and Obstetrics will be held in Geneva from July 26 to July 31, 1954. An Information Bulletin describing the organization of the Congress has been prepared and can be obtained from the Secretariate of the Congress, Maternite, Geneva, Switzerland, or in all branches of the American Express Company.
